# Supplementary material for: Risk factors and subgroups analysis of Enasidenib in treating Acute Myelogenous Leukemia : a pharmacovigilance study based on FAERS database
Source: Research Square preprint supplement (doi:10.21203/rs.3.rs-6698707/v1), 2025-08-21
Supplement: Supplementary file 1 [file 2fb75358a38e07e89a927c24.docx]

**Supplementary Data**

**Table S1. Calculation of reporting odds ratio (ROR) and Proportional Reporting Ratio(BCPNN)**.

| Items | Reports with target AE | Reports without target AE |
| --- | --- | --- |
| Reports with ivosidenib/enasidenib | a | b |
| Reports without ivosidenib/enasidenib | c | d |
| Total | a+c | b+d |

Abbreviations: a, number of reports containing enasidenib and target AE; b, number of reports containing other AEs of the target drug; c, number of reports containing the target AE of other drugs; d, number of reports containing other drugs and other AEs

**Table S2. Calculation formula and Principle of ROR, BCPNN and standard of signal detection.**

| ROR |  | a≥3  95%CI＞1 |
| --- | --- | --- |
| BCPNN |  | a≥3  (IC-2SD)＞0 |

Abbreviations: ROR, Reporting odds ratio; PRR, Proportional Reporting Ratio; CI, Confidence Interval; IC, Information Component;χ2:chi-square test.

**Table S3. Negative signals of the preferred term (PT) and the clinical priority assessing results. (n** ≥ **3)**

| SOC | PT | case number | ROR(95%Cl) | IC(IC025) |
| --- | --- | --- | --- | --- |
| blood and lymphatic system disorders | febrile neutropenia | 43 | 0.35 ( 0.26 - 0.47 ) | -1.46 ( -1.9 ) |
| thrombocytopenia | 25 | 0.51 ( 0.35 - 0.76 ) | -0.93 ( -1.5 ) |
| neutropenia | 18 | 0.26 ( 0.16 - 0.42 ) | -1.88 ( -2.54 ) |
| pancytopenia | 18 | 0.45 ( 0.28 - 0.71 ) | -1.13 ( -1.8 ) |
| anaemia | 17 | 0.51 ( 0.32 - 0.83 ) | -0.93 ( -1.62 ) |
| cytopenia | 7 | 0.34 ( 0.16 - 0.72 ) | -1.51 ( -2.54 ) |
| leukocytosis | 6 | 1.58 ( 0.69 - 3.59 ) | 0.63 ( -0.5 ) |
| lymphadenopathy | 5 | 1.53 ( 0.62 - 3.78 ) | 0.59 ( -0.63 ) |
| bone marrow failure | 5 | 0.25 ( 0.11 - 0.61 ) | -1.93 ( -3.12 ) |
| platelet disorder | 5 | 2.48 ( 0.99 - 6.21 ) | 1.24 ( 0 ) |
| blood disorder | 4 | 1.58 ( 0.58 - 4.34 ) | 0.63 ( -0.7 ) |
| disseminated intravascular coagulation | 3 | 0.61 ( 0.19 - 1.9 ) | -0.7 ( -2.16 ) |
| haematotoxicity | 3 | 0.49 ( 0.16 - 1.55 ) | -0.99 ( -2.45 ) |
| cardiac disorders | atrial fibrillation | 9 | 0.91 ( 0.47 - 1.78 ) | -0.13 ( -1.06 ) |
| cardiac failure | 6 | 0.54 ( 0.24 - 1.22 ) | -0.86 ( -1.96 ) |
| cardiomyopathy | 4 | 1.07 ( 0.39 - 2.91 ) | 0.1 ( -1.23 ) |
| myocardial infarction | 4 | 0.92 ( 0.34 - 2.49 ) | -0.12 ( -1.44 ) |
| pericardial effusion | 3 | 0.55 ( 0.18 - 1.74 ) | -0.83 ( -2.29 ) |
| pericarditis | 3 | 1.39 ( 0.44 - 4.43 ) | 0.45 ( -1.03 ) |
| cardiac arrest | 3 | 0.44 ( 0.14 - 1.38 ) | -1.15 ( -2.61 ) |
| cardiac disorder | 3 | 0.63 ( 0.2 - 1.99 ) | -0.64 ( -2.1 ) |
| gastrointestinal disorders | stomatitis | 11 | 1.31 ( 0.72 - 2.41 ) | 0.38 ( -0.48 ) |
| abdominal pain | 9 | 1 ( 0.51 - 1.94 ) | 0 ( -0.93 ) |
| colitis | 6 | 0.81 ( 0.36 - 1.83 ) | -0.29 ( -1.4 ) |
| gastrointestinal haemorrhage | 6 | 0.8 ( 0.36 - 1.81 ) | -0.31 ( -1.42 ) |
| gastrointestinal disorder | 5 | 1.06 ( 0.43 - 2.59 ) | 0.08 ( -1.13 ) |
| dyspepsia | 4 | 2.06 ( 0.75 - 5.7 ) | 0.99 ( -0.36 ) |
| haematemesis | 3 | 1.64 ( 0.51 - 5.26 ) | 0.68 ( -0.82 ) |
| oral pain | 3 | 1.91 ( 0.59 - 6.15 ) | 0.88 ( -0.62 ) |
| mouth haemorrhage | 3 | 2.34 ( 0.72 - 7.62 ) | 1.16 ( -0.36 ) |
| melaena | 3 | 0.93 ( 0.29 - 2.94 ) | -0.1 ( -1.57 ) |
| general disorders and administration site conditions | pyrexia | 64 | 0.86 ( 0.67 - 1.11 ) | -0.2 ( -0.57 ) |
| drug ineffective | 47 | 0.99 ( 0.74 - 1.32 ) | -0.02 ( -0.45 ) |
| malaise | 19 | 1.41 ( 0.89 - 2.24 ) | 0.47 ( -0.19 ) |
| pain | 17 | 1.5 ( 0.92 - 2.45 ) | 0.56 ( -0.14 ) |
| disease progression | 10 | 0.57 ( 0.3 - 1.07 ) | -0.79 ( -1.67 ) |
| multiple organ dysfunction syndrome | 8 | 0.49 ( 0.24 - 0.99 ) | -0.99 ( -1.97 ) |
| illness | 7 | 1.71 ( 0.8 - 3.67 ) | 0.74 ( -0.32 ) |
| oedema peripheral | 6 | 1.16 ( 0.51 - 2.63 ) | 0.21 ( -0.91 ) |
| chest pain | 6 | 1.06 ( 0.47 - 2.39 ) | 0.08 ( -1.04 ) |
| drug intolerance | 6 | 1.13 ( 0.5 - 2.56 ) | 0.17 ( -0.95 ) |
| general physical health deterioration | 5 | 0.45 ( 0.19 - 1.09 ) | -1.12 ( -2.31 ) |
| therapy non-responder | 5 | 0.78 ( 0.32 - 1.89 ) | -0.35 ( -1.55 ) |
| gait disturbance | 5 | 1.37 ( 0.56 - 3.35 ) | 0.43 ( -0.78 ) |
| chest discomfort | 4 | 2.54 ( 0.91 - 7.08 ) | 1.27 ( -0.09 ) |
| swelling | 4 | 2.28 ( 0.82 - 6.32 ) | 1.12 ( -0.23 ) |
| therapeutic product effect decreased | 3 | 2.48 ( 0.76 - 8.1 ) | 1.24 ( -0.28 ) |
| chills | 3 | 0.4 ( 0.13 - 1.26 ) | -1.28 ( -2.74 ) |
| hepatobiliary disorders | hyperbilirubinaemia | 8 | 1.6 ( 0.78 - 3.26 ) | 0.64 ( -0.35 ) |
| liver disorder | 8 | 1.41 ( 0.69 - 2.87 ) | 0.47 ( -0.51 ) |
| jaundice | 4 | 1.88 ( 0.68 - 5.19 ) | 0.87 ( -0.47 ) |
| hepatotoxicity | 3 | 0.82 ( 0.26 - 2.58 ) | -0.28 ( -1.75 ) |
| immune system disorders | graft versus host disease | 3 | 0.37 ( 0.12 - 1.15 ) | -1.41 ( -2.86 ) |
| immunodeficiency | 3 | 0.81 ( 0.26 - 2.56 ) | -0.29 ( -1.76 ) |
| haemophagocytic lymphohistiocytosis | 3 | 0.99 ( 0.31 - 3.12 ) | -0.02 ( -1.49 ) |
| infections and infestations | pneumonia | 69 | 1.05 ( 0.82 - 1.34 ) | 0.06 ( -0.29 ) |
| sepsis | 46 | 0.98 ( 0.73 - 1.32 ) | -0.03 ( -0.46 ) |
| septic shock | 23 | 0.87 ( 0.57 - 1.32 ) | -0.19 ( -0.79 ) |
| infection | 21 | 0.48 ( 0.31 - 0.74 ) | -1.02 ( -1.64 ) |
| covid-19 | 15 | 1.03 ( 0.61 - 1.72 ) | 0.04 ( -0.7 ) |
| pneumonia fungal | 9 | 0.98 ( 0.51 - 1.91 ) | -0.02 ( -0.95 ) |
| bacteraemia | 7 | 0.62 ( 0.29 - 1.3 ) | -0.68 ( -1.71 ) |
| influenza | 7 | 1.62 ( 0.76 - 3.48 ) | 0.66 ( -0.39 ) |
| clostridium difficile colitis | 6 | 1.45 ( 0.64 - 3.3 ) | 0.51 ( -0.61 ) |
| urinary tract infection | 6 | 0.62 ( 0.28 - 1.4 ) | -0.66 ( -1.76 ) |
| skin infection | 5 | 1.65 ( 0.67 - 4.06 ) | 0.69 ( -0.53 ) |
| localised infection | 5 | 2.07 ( 0.83 - 5.14 ) | 1 ( -0.23 ) |
| fungal infection | 5 | 0.53 ( 0.22 - 1.29 ) | -0.89 ( -2.08 ) |
| staphylococcal sepsis | 5 | 1.87 ( 0.76 - 4.63 ) | 0.86 ( -0.36 ) |
| covid-19 pneumonia | 5 | 1.85 ( 0.75 - 4.57 ) | 0.84 ( -0.38 ) |
| diverticulitis | 4 | 1.1 ( 0.41 - 3 ) | 0.14 ( -1.19 ) |
| neutropenic sepsis | 4 | 0.71 ( 0.26 - 1.91 ) | -0.48 ( -1.79 ) |
| device related infection | 4 | 0.98 ( 0.36 - 2.67 ) | -0.02 ( -1.34 ) |
| viral infection | 4 | 2.23 ( 0.8 - 6.18 ) | 1.1 ( -0.25 ) |
| sinusitis | 4 | 1.11 ( 0.41 - 3.03 ) | 0.15 ( -1.17 ) |
| pneumocystis jirovecii pneumonia | 4 | 1.26 ( 0.46 - 3.42 ) | 0.32 ( -1.01 ) |
| bronchopulmonary aspergillosis | 3 | 0.27 ( 0.09 - 0.83 ) | -1.86 ( -3.32 ) |
| upper respiratory tract infection | 3 | 2.1 ( 0.65 - 6.8 ) | 1.02 ( -0.49 ) |
| cystitis | 3 | 1.91 ( 0.59 - 6.15 ) | 0.88 ( -0.62 ) |
| bronchitis | 3 | 2.1 ( 0.65 - 6.8 ) | 1.02 ( -0.49 ) |
| escherichia sepsis | 3 | 0.99 ( 0.31 - 3.12 ) | -0.02 ( -1.49 ) |
| alpha haemolytic streptococcal infection | 3 | 2.48 ( 0.76 - 8.1 ) | 1.24 ( -0.28 ) |
| injury, poisoning and procedural complications | off label use | 85 | 0.52 ( 0.42 - 0.65 ) | -0.88 ( -1.2 ) |
| subdural haematoma | 5 | 1.48 ( 0.6 - 3.65 ) | 0.54 ( -0.67 ) |
| contusion | 5 | 1.57 ( 0.64 - 3.87 ) | 0.62 ( -0.59 ) |
| head injury | 4 | 2.28 ( 0.82 - 6.32 ) | 1.12 ( -0.23 ) |
| investigations | white blood cell count decreased | 38 | 0.94 ( 0.68 - 1.3 ) | -0.09 ( -0.56 ) |
| haemoglobin decreased | 32 | 0.9 ( 0.63 - 1.28 ) | -0.15 ( -0.66 ) |
| neutrophil count decreased | 17 | 0.65 ( 0.4 - 1.05 ) | -0.61 ( -1.3 ) |
| laboratory test abnormal | 10 | 1.74 ( 0.92 - 3.3 ) | 0.76 ( -0.14 ) |
| hepatic enzyme increased | 6 | 1.91 ( 0.83 - 4.36 ) | 0.88 ( -0.25 ) |
| full blood count abnormal | 5 | 0.81 ( 0.33 - 1.98 ) | -0.29 ( -1.49 ) |
| blood pressure increased | 4 | 2.02 ( 0.73 - 5.59 ) | 0.96 ( -0.38 ) |
| blood test abnormal | 4 | 1.07 ( 0.39 - 2.91 ) | 0.1 ( -1.23 ) |
| blast cell count increased | 4 | 0.66 ( 0.24 - 1.77 ) | -0.59 ( -1.9 ) |
| electrocardiogram qt prolonged | 4 | 0.4 ( 0.15 - 1.07 ) | -1.29 ( -2.59 ) |
| ejection fraction decreased | 3 | 0.72 ( 0.23 - 2.28 ) | -0.45 ( -1.92 ) |
| platelet count increased | 3 | 1.37 ( 0.43 - 4.36 ) | 0.43 ( -1.06 ) |
| blood creatinine increased | 3 | 0.48 ( 0.15 - 1.49 ) | -1.04 ( -2.5 ) |
| metabolism and nutrition disorders | tumour lysis syndrome | 11 | 0.66 ( 0.36 - 1.21 ) | -0.57 ( -1.42 ) |
| dehydration | 11 | 1.68 ( 0.91 - 3.09 ) | 0.71 ( -0.15 ) |
| hypokalaemia | 5 | 0.61 ( 0.25 - 1.48 ) | -0.69 ( -1.89 ) |
| hyponatraemia | 3 | 0.83 ( 0.26 - 2.61 ) | -0.26 ( -1.74 ) |
| musculoskeletal and connective tissue disorders | back pain | 6 | 0.93 ( 0.41 - 2.09 ) | -0.11 ( -1.22 ) |
| muscle spasms | 5 | 2.4 ( 0.96 - 5.98 ) | 1.19 ( -0.04 ) |
| myalgia | 4 | 1.15 ( 0.42 - 3.13 ) | 0.19 ( -1.13 ) |
| neoplasms benign, malignant and unspecified (incl cysts and polyps) | acute myeloid leukaemia recurrent | 16 | 0.5 ( 0.31 - 0.83 ) | -0.96 ( -1.67 ) |
| malignant neoplasm progression | 5 | 0.78 ( 0.32 - 1.91 ) | -0.34 ( -1.54 ) |
| leukaemia | 4 | 0.51 ( 0.19 - 1.36 ) | -0.96 ( -2.26 ) |
| nervous system disorders | cerebral haemorrhage | 8 | 0.99 ( 0.49 - 2 ) | -0.02 ( -1 ) |
| cerebrovascular accident | 8 | 1.79 ( 0.88 - 3.67 ) | 0.8 ( -0.19 ) |
| syncope | 6 | 1.21 ( 0.54 - 2.75 ) | 0.27 ( -0.85 ) |
| loss of consciousness | 4 | 1.08 ( 0.4 - 2.94 ) | 0.11 ( -1.21 ) |
| lethargy | 4 | 2.67 ( 0.95 - 7.45 ) | 1.33 ( -0.03 ) |
| haemorrhage intracranial | 4 | 1.16 ( 0.43 - 3.16 ) | 0.21 ( -1.12 ) |
| tremor | 3 | 0.95 ( 0.3 - 3.01 ) | -0.07 ( -1.54 ) |
| memory impairment | 3 | 1.3 ( 0.41 - 4.14 ) | 0.36 ( -1.12 ) |
| psychiatric disorders | confusional state | 10 | 1.76 ( 0.93 - 3.35 ) | 0.78 ( -0.12 ) |
| depression | 6 | 2.16 ( 0.94 - 4.96 ) | 1.05 ( -0.09 ) |
| anxiety | 4 | 1.88 ( 0.68 - 5.19 ) | 0.87 ( -0.47 ) |
| hallucination | 3 | 1.49 ( 0.47 - 4.76 ) | 0.55 ( -0.94 ) |
| emotional disorder | 3 | 2.93 ( 0.89 - 9.63 ) | 1.45 ( -0.08 ) |
| renal and urinary disorders | renal failure | 15 | 1.57 ( 0.93 - 2.64 ) | 0.62 ( -0.13 ) |
| acute kidney injury | 10 | 0.54 ( 0.29 - 1 ) | -0.87 ( -1.75 ) |
| renal impairment | 6 | 0.99 ( 0.44 - 2.24 ) | -0.01 ( -1.12 ) |
| respiratory, thoracic and mediastinal disorders | respiratory failure | 16 | 0.99 ( 0.6 - 1.64 ) | -0.01 ( -0.72 ) |
| epistaxis | 12 | 1.5 ( 0.84 - 2.69 ) | 0.56 ( -0.26 ) |
| pleural effusion | 8 | 0.87 ( 0.43 - 1.77 ) | -0.19 ( -1.17 ) |
| hypoxia | 4 | 0.59 ( 0.22 - 1.59 ) | -0.74 ( -2.05 ) |
| haemoptysis | 4 | 1.42 ( 0.52 - 3.88 ) | 0.48 ( -0.85 ) |
| acute respiratory failure | 3 | 0.83 ( 0.26 - 2.61 ) | -0.26 ( -1.74 ) |
| lung disorder | 3 | 0.5 ( 0.16 - 1.57 ) | -0.97 ( -2.43 ) |
| pulmonary oedema | 3 | 0.55 ( 0.18 - 1.72 ) | -0.84 ( -2.3 ) |
| oropharyngeal pain | 3 | 1.06 ( 0.34 - 3.37 ) | 0.09 ( -1.39 ) |
| pulmonary embolism | 3 | 1.09 ( 0.34 - 3.46 ) | 0.12 ( -1.36 ) |
| skin and subcutaneous tissue disorders | rash | 27 | 1.39 ( 0.94 - 2.05 ) | 0.45 ( -0.11 ) |
| urticaria | 5 | 2.32 ( 0.93 - 5.77 ) | 1.14 ( -0.09 ) |
| rash pruritic | 5 | 2.17 ( 0.87 - 5.39 ) | 1.06 ( -0.17 ) |
| dry skin | 5 | 2.28 ( 0.91 - 5.67 ) | 1.12 ( -0.11 ) |
| alopecia | 4 | 1.2 ( 0.44 - 3.27 ) | 0.25 ( -1.07 ) |
| skin exfoliation | 3 | 1.64 ( 0.51 - 5.26 ) | 0.68 ( -0.82 ) |
| rash erythematous | 3 | 1.05 ( 0.33 - 3.33 ) | 0.07 ( -1.41 ) |
| erythema | 3 | 0.66 ( 0.21 - 2.06 ) | -0.59 ( -2.06 ) |
| skin lesion | 3 | 1.2 ( 0.38 - 3.83 ) | 0.26 ( -1.22 ) |
| vascular disorders | hypotension | 12 | 0.88 ( 0.49 - 1.56 ) | -0.18 ( -1 ) |
| hypertension | 7 | 1.25 ( 0.59 - 2.67 ) | 0.31 ( -0.74 ) |
| haemorrhage | 6 | 0.81 ( 0.36 - 1.83 ) | -0.29 ( -1.4 ) |
| haematoma | 4 | 2.6 ( 0.93 - 7.26 ) | 1.3 ( -0.06 ) |
| thrombosis | 4 | 1.1 ( 0.41 - 3 ) | 0.14 ( -1.19 ) |

**Table S4. PTs in different gender groups. (n** ≥ **3)**

| female | | | | male | | | |
| --- | --- | --- | --- | --- | --- | --- | --- |
| PT | Case number | ROR(95%Cl) | IC(IC025) | PT | Case number | ROR(95%Cl) | IC(IC025) |
| abdominal pain upper | 6 | 2.87 ( 1.24 - 6.69 ) | 1.42 ( 0.27 ) | insomnia | 10 | 5.41 ( 2.72 - 10.75 ) | 2.2 ( 1.25 ) |
| neuropathy peripheral | 6 | 4.94 ( 2.06 - 11.84 ) | 2.11 ( 0.92 ) | haemoglobin abnormal | 10 | 3.16 ( 1.63 - 6.12 ) | 1.54 ( 0.61 ) |
| insomnia | 6 | 4.79 ( 2.01 - 11.46 ) | 2.07 ( 0.89 ) | peripheral swelling | 9 | 2.74 ( 1.37 - 5.46 ) | 1.35 ( 0.39 ) |
| laboratory test abnormal | 6 | 2.59 ( 1.12 - 6 ) | 1.29 ( 0.14 ) | joint swelling | 9 | 8.77 ( 4.09 - 18.8 ) | 2.74 ( 1.71 ) |
| taste disorder | 6 | 8.33 ( 3.32 - 20.88 ) | 2.71 ( 1.48 ) | somnolence | 8 | 6.28 ( 2.88 - 13.68 ) | 2.37 ( 1.31 ) |
| muscular weakness | 5 | 3.66 ( 1.43 - 9.34 ) | 1.73 ( 0.47 ) | dysgeusia | 8 | 12.98 ( 5.5 - 30.66 ) | 3.14 ( 2.01 ) |
| rhinorrhoea | 5 | 16.48 ( 5.38 - 50.42 ) | 3.39 ( 1.98 ) | abdominal pain upper | 8 | 2.9 ( 1.39 - 6.05 ) | 1.43 ( 0.41 ) |
| eastern cooperative oncology group performance status worsened | 5 | 43.95 ( 10.49 - 184.05 ) | 4.09 ( 2.57 ) | confusional state | 8 | 2.26 ( 1.09 - 4.67 ) | 1.1 ( 0.1 ) |
| haemoglobin abnormal | 5 | 2.58 ( 1.03 - 6.48 ) | 1.28 ( 0.04 ) | abdominal discomfort | 7 | 4.37 ( 1.95 - 9.77 ) | 1.94 ( 0.84 ) |
| blood pressure decreased | 4 | 5.02 ( 1.72 - 14.63 ) | 2.13 ( 0.72 ) | eastern cooperative oncology group performance status worsened | 7 | 170.38 ( 20.95 - 1385.44 ) | 4.47 ( 3.06 ) |
| blood uric acid increased | 4 | 13.17 ( 3.96 - 43.79 ) | 3.19 ( 1.67 ) | influenza | 6 | 2.35 ( 1.02 - 5.44 ) | 1.16 ( 0.01 ) |
| viral infection | 4 | 4.58 ( 1.58 - 13.26 ) | 2.02 ( 0.61 ) | hepatic enzyme increased | 6 | 3.47 ( 1.47 - 8.18 ) | 1.66 ( 0.49 ) |
| thrombocytosis | 4 | 8.78 ( 2.83 - 27.26 ) | 2.77 ( 1.3 ) | white blood cell count abnormal | 6 | 2.8 ( 1.2 - 6.54 ) | 1.39 ( 0.23 ) |
| staphylococcal sepsis | 4 | 3.63 ( 1.28 - 10.34 ) | 1.73 ( 0.34 ) | adverse event | 6 | 8.58 ( 3.38 - 21.79 ) | 2.72 ( 1.48 ) |
| acute febrile neutrophilic dermatosis | 4 | 2.85 ( 1.01 - 8 ) | 1.41 ( 0.05 ) | gout | 5 | 4.5 ( 1.73 - 11.7 ) | 1.98 ( 0.7 ) |
| haematoma | 3 | 3.76 ( 1.12 - 12.62 ) | 1.77 ( 0.21 ) | paraesthesia | 5 | 7.15 ( 2.64 - 19.4 ) | 2.52 ( 1.2 ) |
| musculoskeletal pain | 3 | 6.08 ( 1.73 - 21.34 ) | 2.36 ( 0.75 ) | platelet disorder | 5 | 2.96 ( 1.17 - 7.51 ) | 1.46 ( 0.21 ) |
| rash pruritic | 3 | 3.43 ( 1.03 - 11.45 ) | 1.65 ( 0.11 ) | platelet count abnormal | 5 | 2.89 ( 1.14 - 7.32 ) | 1.43 ( 0.18 ) |
| hypoaesthesia | 3 | 4.94 ( 1.44 - 16.96 ) | 2.11 ( 0.53 ) | bone pain | 4 | 4.42 ( 1.52 - 12.83 ) | 1.96 ( 0.55 ) |
| joint swelling | 3 | 11.29 ( 2.92 - 43.68 ) | 3.03 ( 1.35 ) | liver function test increased | 4 | 4.42 ( 1.52 - 12.83 ) | 1.96 ( 0.55 ) |
| blood pressure increased | 3 | 3.43 ( 1.03 - 11.45 ) | 1.65 ( 0.11 ) | sleep disorder | 4 | 8.1 ( 2.61 - 25.14 ) | 2.66 ( 1.19 ) |
| mouth haemorrhage | 3 | 5.27 ( 1.52 - 18.21 ) | 2.19 ( 0.6 ) | nasopharyngitis | 4 | 2.86 ( 1.01 - 8.06 ) | 1.41 ( 0.04 ) |
| hyperleukocytosis | 3 | 15.8 ( 3.77 - 66.17 ) | 3.36 ( 1.62 ) | chest discomfort | 4 | 4.63 ( 1.59 - 13.49 ) | 2.02 ( 0.6 ) |
| myositis | 3 | 15.8 ( 3.77 - 66.17 ) | 3.36 ( 1.62 ) | hypersomnia | 4 | 7.48 ( 2.44 - 22.95 ) | 2.57 ( 1.11 ) |
| alpha haemolytic streptococcal infection | 3 | 5.64 ( 1.62 - 19.65 ) | 2.27 ( 0.67 ) | head injury | 4 | 5.12 ( 1.74 - 15.05 ) | 2.14 ( 0.72 ) |
| / | / | / | / | blood potassium decreased | 4 | 4.42 ( 1.52 - 12.83 ) | 1.96 ( 0.55 ) |
| / | / | / | / | pollakiuria | 3 | 4.29 ( 1.26 - 14.64 ) | 1.92 ( 0.35 ) |
| / | / | / | / | ageusia | 3 | 12.15 ( 3.04 - 48.6 ) | 3.07 ( 1.37 ) |
| / | / | / | / | influenza like illness | 3 | 6.07 ( 1.71 - 21.53 ) | 2.34 ( 0.72 ) |
| / | / | / | / | dry mouth | 3 | 4.55 ( 1.33 - 15.64 ) | 2 ( 0.41 ) |
| / | / | / | / | depressed mood | 3 | 4.55 ( 1.33 - 15.64 ) | 2 ( 0.41 ) |
| / | / | / | / | chronic obstructive pulmonary disease | 3 | 3.64 ( 1.08 - 12.27 ) | 1.72 ( 0.16 ) |
| / | / | / | / | arthritis | 3 | 6.07 ( 1.71 - 21.53 ) | 2.34 ( 0.72 ) |
| / | / | / | / | back disorder | 3 | 24.29 ( 4.9 - 120.44 ) | 3.66 ( 1.85 ) |

**TABLE S5. The Negative signals of PTs of different age groups (N≥3).**

| Age groups | PT | Case number | ROR(95%Cl) | IC(IC025) |
| --- | --- | --- | --- | --- |
| <18 | / | / | / | / |
| 18-64.9 | pneumonia | 11 | 1.47 ( 0.8 - 2.68 ) | 0.53 ( -0.32 ) |
| febrile neutropenia | 9 | 0.5 ( 0.26 - 0.98 ) | -0.95 ( -1.88 ) |
| diarrhoea | 7 | 1.42 ( 0.67 - 3.02 ) | 0.49 ( -0.55 ) |
| platelet count decreased | 6 | 0.98 ( 0.43 - 2.2 ) | -0.03 ( -1.14 ) |
| drug ineffective | 5 | 0.58 ( 0.24 - 1.42 ) | -0.76 ( -1.95 ) |
| vomiting | 4 | 1.31 ( 0.48 - 3.53 ) | 0.38 ( -0.94 ) |
| pancytopenia | 4 | 0.67 ( 0.25 - 1.79 ) | -0.57 ( -1.88 ) |
| respiratory failure | 4 | 1.3 ( 0.48 - 3.51 ) | 0.37 ( -0.95 ) |
| septic shock | 4 | 0.84 ( 0.31 - 2.26 ) | -0.25 ( -1.55 ) |
| bacteraemia | 3 | 1.57 ( 0.5 - 4.96 ) | 0.64 ( -0.84 ) |
| malaise | 3 | 2.33 ( 0.73 - 7.41 ) | 1.18 ( -0.3 ) |
| rash | 3 | 0.86 ( 0.27 - 2.69 ) | -0.22 ( -1.68 ) |
| abdominal pain | 3 | 2.39 ( 0.75 - 7.61 ) | 1.22 ( -0.26 ) |
| pneumonia fungal | 3 | 1.84 ( 0.58 - 5.82 ) | 0.85 ( -0.62 ) |
| 65-85 | acute myeloid leukaemia | 55 | 1.28 ( 0.97 - 1.68 ) | 0.33 ( -0.08 ) |
| pneumonia | 37 | 0.94 ( 0.68 - 1.32 ) | -0.08 ( -0.56 ) |
| febrile neutropenia | 31 | 0.47 ( 0.33 - 0.68 ) | -1.02 ( -1.54 ) |
| pyrexia | 26 | 0.71 ( 0.48 - 1.06 ) | -0.46 ( -1.03 ) |
| sepsis | 21 | 0.87 ( 0.56 - 1.35 ) | -0.19 ( -0.82 ) |
| thrombocytopenia | 15 | 0.54 ( 0.32 - 0.91 ) | -0.84 ( -1.57 ) |
| septic shock | 15 | 1.15 ( 0.68 - 1.93 ) | 0.19 ( -0.56 ) |
| haemoglobin decreased | 15 | 0.97 ( 0.58 - 1.64 ) | -0.04 ( -0.78 ) |
| constipation | 15 | 1.49 ( 0.88 - 2.52 ) | 0.54 ( -0.21 ) |
| white blood cell count decreased | 15 | 0.72 ( 0.43 - 1.21 ) | -0.45 ( -1.19 ) |
| fall | 14 | 1.64 ( 0.95 - 2.83 ) | 0.67 ( -0.11 ) |
| anaemia | 13 | 0.61 ( 0.35 - 1.06 ) | -0.69 ( -1.47 ) |
| pancytopenia | 11 | 0.58 ( 0.32 - 1.06 ) | -0.75 ( -1.6 ) |
| respiratory failure | 10 | 1.48 ( 0.78 - 2.81 ) | 0.53 ( -0.37 ) |
| dizziness | 9 | 1.36 ( 0.69 - 2.67 ) | 0.41 ( -0.53 ) |
| covid-19 | 9 | 1.19 ( 0.61 - 2.34 ) | 0.24 ( -0.7 ) |
| neutrophil count decreased | 8 | 0.5 ( 0.25 - 1.01 ) | -0.96 ( -1.94 ) |
| vomiting | 8 | 0.77 ( 0.38 - 1.55 ) | -0.37 ( -1.35 ) |
| red blood cell count decreased | 8 | 1.63 ( 0.79 - 3.35 ) | 0.66 ( -0.34 ) |
| rash | 8 | 1.35 ( 0.66 - 2.77 ) | 0.41 ( -0.59 ) |
| neutropenia | 8 | 0.2 ( 0.1 - 0.4 ) | -2.27 ( -3.23 ) |
| drug ineffective | 8 | 0.57 ( 0.28 - 1.15 ) | -0.78 ( -1.76 ) |
| acute kidney injury | 7 | 0.64 ( 0.3 - 1.37 ) | -0.61 ( -1.65 ) |
| epistaxis | 7 | 1.81 ( 0.84 - 3.93 ) | 0.8 ( -0.26 ) |
| multiple organ dysfunction syndrome | 7 | 1.48 ( 0.69 - 3.19 ) | 0.53 ( -0.53 ) |
| cerebral haemorrhage | 7 | 1.73 ( 0.8 - 3.74 ) | 0.74 ( -0.33 ) |
| weight decreased | 7 | 1.53 ( 0.71 - 3.3 ) | 0.57 ( -0.49 ) |
| pleural effusion | 6 | 1.37 ( 0.6 - 3.12 ) | 0.42 ( -0.71 ) |
| pneumonia fungal | 6 | 1.32 ( 0.58 - 3.02 ) | 0.38 ( -0.75 ) |
| atrial fibrillation | 6 | 0.87 ( 0.38 - 1.97 ) | -0.19 ( -1.31 ) |
| cerebrovascular accident | 6 | 2.17 ( 0.93 - 5.03 ) | 1.04 ( -0.11 ) |
| infection | 5 | 0.29 ( 0.12 - 0.7 ) | -1.73 ( -2.92 ) |
| syncope | 5 | 1.36 ( 0.55 - 3.36 ) | 0.42 ( -0.8 ) |
| pain in extremity | 5 | 1.75 ( 0.7 - 4.35 ) | 0.75 ( -0.48 ) |
| abdominal pain upper | 5 | 2.33 ( 0.92 - 5.87 ) | 1.13 ( -0.11 ) |
| pruritus | 5 | 2.28 ( 0.9 - 5.74 ) | 1.1 ( -0.14 ) |
| confusional state | 5 | 2.18 ( 0.87 - 5.49 ) | 1.05 ( -0.2 ) |
| hypotension | 5 | 0.73 ( 0.3 - 1.77 ) | -0.44 ( -1.65 ) |
| clostridium difficile colitis | 4 | 2.26 ( 0.81 - 6.36 ) | 1.1 ( -0.27 ) |
| tumour lysis syndrome | 4 | 0.35 ( 0.13 - 0.93 ) | -1.48 ( -2.79 ) |
| renal impairment | 4 | 1.33 ( 0.48 - 3.66 ) | 0.39 ( -0.95 ) |
| dehydration | 4 | 1.06 ( 0.39 - 2.9 ) | 0.08 ( -1.25 ) |
| stomatitis | 4 | 1.71 ( 0.62 - 4.74 ) | 0.73 ( -0.62 ) |
| hypokalaemia | 4 | 0.88 ( 0.32 - 2.4 ) | -0.18 ( -1.5 ) |
| hypoxia | 4 | 1.12 ( 0.41 - 3.05 ) | 0.15 ( -1.18 ) |
| cardiac failure | 4 | 0.71 ( 0.26 - 1.94 ) | -0.46 ( -1.78 ) |
| disease progression | 4 | 0.46 ( 0.17 - 1.24 ) | -1.09 ( -2.39 ) |
| chest pain | 4 | 1.78 ( 0.64 - 4.95 ) | 0.78 ( -0.57 ) |
| hypertension | 4 | 1.82 ( 0.65 - 5.06 ) | 0.81 ( -0.54 ) |
| bone marrow failure | 4 | 0.74 ( 0.27 - 2.01 ) | -0.42 ( -1.74 ) |
| covid-19 pneumonia | 4 | 1.82 ( 0.65 - 5.06 ) | 0.81 ( -0.54 ) |
| gait disturbance | 4 | 2.79 ( 0.98 - 7.94 ) | 1.37 ( -0.01 ) |
| skin infection | 3 | 2.17 ( 0.66 - 7.12 ) | 1.04 ( -0.49 ) |
| acute respiratory failure | 3 | 1.36 ( 0.42 - 4.39 ) | 0.42 ( -1.08 ) |
| haematoma | 3 | 2.99 ( 0.89 - 10.04 ) | 1.45 ( -0.1 ) |
| cardiomyopathy | 3 | 2.33 ( 0.71 - 7.68 ) | 1.13 ( -0.4 ) |
| neuropathy peripheral | 3 | 3.31 ( 0.98 - 11.19 ) | 1.58 ( 0.02 ) |
| localised infection | 3 | 2.17 ( 0.66 - 7.12 ) | 1.04 ( -0.49 ) |
| upper respiratory tract infection | 3 | 2.62 ( 0.79 - 8.7 ) | 1.28 ( -0.26 ) |
| malaise | 3 | 0.5 ( 0.16 - 1.58 ) | -0.96 ( -2.43 ) |
| balance disorder | 3 | 2.99 ( 0.89 - 10.04 ) | 1.45 ( -0.1 ) |
| acute myeloid leukaemia recurrent | 3 | 0.31 ( 0.1 - 0.96 ) | -1.65 ( -3.11 ) |
| head injury | 3 | 2.86 ( 0.85 - 9.55 ) | 1.4 ( -0.16 ) |
| chronic obstructive pulmonary disease | 3 | 3.31 ( 0.98 - 11.19 ) | 1.58 ( 0.02 ) |
| immunodeficiency | 3 | 1.43 ( 0.44 - 4.6 ) | 0.48 ( -1.02 ) |
| sinusitis | 3 | 1.79 ( 0.55 - 5.84 ) | 0.79 ( -0.73 ) |
| gastrointestinal disorder | 3 | 2.99 ( 0.89 - 10.04 ) | 1.45 ( -0.1 ) |
| liver disorder | 3 | 1.08 ( 0.34 - 3.46 ) | 0.11 ( -1.38 ) |
| pneumocystis jirovecii pneumonia | 3 | 2.33 ( 0.71 - 7.68 ) | 1.13 ( -0.4 ) |
| escherichia sepsis | 3 | 1.57 ( 0.49 - 5.08 ) | 0.61 ( -0.9 ) |
| abdominal discomfort | 3 | 2.62 ( 0.79 - 8.7 ) | 1.28 ( -0.26 ) |
| >85 | death | 14 | 1.26 ( 0.7 - 2.24 ) | 0.27 ( -0.54 ) |
